# Supplementary material for: Mineralocorticoid Receptor Antagonism in Patients With Atrial Fibrillation: Findings From the ORBIT‐AF (Outcomes Registry for Better Informed Treatment of Atrial Fibrillation) Registry
Source: PubMed Central journal article supplement — J Am Heart Assoc. 2018 Apr 13;7(8):e007987. doi: 10.1161/JAHA.117.007987 (PMC6015424; doi:10.1161/jaha.117.007987), 2018-04-13
Supplement: JAH3-7-e007987-s001.pdf [file JAH3-7-e007987-s001.pdf]

# **SUPPLEMENTAL MATERIAL**

**Table S1. Propensity Score Covariate List.**

|                                                                                                                                                                                                                                                                                                                                                                                                                                                                                                                                                                                                                                                                                                                                                                                                                                                                   |                                                                                                                                                                                                                                                                                                                                                                                                                                                                                                                                                                                                                                                                                                                                                                                                                                                                                                                                                                                                                                                                                                       |
|-------------------------------------------------------------------------------------------------------------------------------------------------------------------------------------------------------------------------------------------------------------------------------------------------------------------------------------------------------------------------------------------------------------------------------------------------------------------------------------------------------------------------------------------------------------------------------------------------------------------------------------------------------------------------------------------------------------------------------------------------------------------------------------------------------------------------------------------------------------------|-------------------------------------------------------------------------------------------------------------------------------------------------------------------------------------------------------------------------------------------------------------------------------------------------------------------------------------------------------------------------------------------------------------------------------------------------------------------------------------------------------------------------------------------------------------------------------------------------------------------------------------------------------------------------------------------------------------------------------------------------------------------------------------------------------------------------------------------------------------------------------------------------------------------------------------------------------------------------------------------------------------------------------------------------------------------------------------------------------|
| <p>Demographics:</p> <ul style="list-style-type: none"> <li>• Age</li> <li>• Sex</li> </ul> <p>Medical History:</p> <ul style="list-style-type: none"> <li>• Smoking</li> <li>• Cancer</li> <li>• Hypertension</li> <li>• Diabetes</li> <li>• Obstructive sleep apnea</li> <li>• CPAP</li> <li>• Dialysis</li> <li>• Hyperlipidemia</li> <li>• Anemia</li> <li>• Cognitive impairment/dementia</li> <li>• Frailty</li> <li>• COPD</li> </ul> <p>Cardiovascular history:</p> <ul style="list-style-type: none"> <li>• Peripheral vascular disease</li> <li>• History of stroke/TIA</li> <li>• HF, NYHA class</li> <li>• Significant valvular disease</li> <li>• Prior valve replacement/repair</li> </ul> <p>Coronary Artery Disease History:</p> <ul style="list-style-type: none"> <li>• History of CAD</li> <li>• Prior MI</li> <li>• History of PCI</li> </ul> | <p>Vital Signs and AF Status:</p> <ul style="list-style-type: none"> <li>• Height</li> <li>• Weight</li> <li>• Heart rate</li> <li>• Systolic blood pressure</li> <li>• Diastolic blood pressure</li> <li>• Intraventricular conduction</li> </ul> <p>Echocardiographic Assessment:</p> <ul style="list-style-type: none"> <li>• LVEF type</li> <li>• LAD type</li> </ul> <p>Laboratory Data:</p> <ul style="list-style-type: none"> <li>• eGFR</li> <li>• Hematocrit</li> </ul> <p>Atrial Fibrillation Diagnosis:</p> <ul style="list-style-type: none"> <li>• AF type</li> <li>• EHRA score</li> <li>• Rhythm control</li> <li>• Prior antiarrhythmic drug use</li> <li>• Atrio ventricular node or his bundle ablation</li> <li>• AF duration</li> </ul> <p>Functional Status:</p> <ul style="list-style-type: none"> <li>• Functional status</li> </ul> <p>Device</p> <ul style="list-style-type: none"> <li>• Implanted device type</li> </ul> <p>Current Pharmacotherapy</p> <ul style="list-style-type: none"> <li>• Calcium channel blockers</li> <li>• Statin</li> <li>• Diuretic</li> </ul> |
|-------------------------------------------------------------------------------------------------------------------------------------------------------------------------------------------------------------------------------------------------------------------------------------------------------------------------------------------------------------------------------------------------------------------------------------------------------------------------------------------------------------------------------------------------------------------------------------------------------------------------------------------------------------------------------------------------------------------------------------------------------------------------------------------------------------------------------------------------------------------|-------------------------------------------------------------------------------------------------------------------------------------------------------------------------------------------------------------------------------------------------------------------------------------------------------------------------------------------------------------------------------------------------------------------------------------------------------------------------------------------------------------------------------------------------------------------------------------------------------------------------------------------------------------------------------------------------------------------------------------------------------------------------------------------------------------------------------------------------------------------------------------------------------------------------------------------------------------------------------------------------------------------------------------------------------------------------------------------------------|

AF = atrial fibrillation, CAD = coronary artery disease, CKD = chronic kidney disease, COPD = chronic obstructive pulmonary disease, CPAP = continuous positive airway pressure, eGFR = estimated glomerular filtration rate, HF = heart failure, HR = heart rate, LVEF = left ventricular ejection fraction, LAD = left atrial dimension, EHRA = European heart rhythm association, NYHA = New York Heart Association, PCI = percutaneous coronary intervention, MI = Myocardial infarction.

**Table S2. Standardized differences of propensity matched pairs: New MRA use.**

| <i>Variable</i>                  | <i>MRA<br/>(N=258)</i> | <i>No MRA<br/>(N=1,287)</i> | <i>Standardize<br/>d difference</i> | <i>P-value</i> |
|----------------------------------|------------------------|-----------------------------|-------------------------------------|----------------|
| Age (SD) years                   | 72.3 (10.8)            | 72.3 (11.0)                 | 0.1%                                | 0.9836         |
| Female (%)                       | 128 (49.6)             | 632 (49.1)                  | 1.0%                                | 0.8821         |
| Smoking (%)                      |                        |                             | 9.7%                                | 0.3943         |
| Non-smoker                       | 125 (48.4)             | 627 (48.7)                  |                                     |                |
| Recent or former smoker          | 118 (45.7)             | 555 (43.1)                  |                                     |                |
| Current Smoker                   | 15 (5.8)               | 105 (8.2)                   |                                     |                |
| Cancer (%)                       | 51 (19.8)              | 241 (18.7)                  | 2.6%                                | 0.6965         |
| Hypertension (%)                 | 227 (88.0)             | 1,113 (86.5)                | 4.5%                                | 0.5156         |
| Diabetes (%)                     | 93 (36.0)              | 470 (36.5)                  | 1.0%                                | 0.8855         |
| Obstructive sleep apnea (%)      | 50 (19.4)              | 261 (20.3)                  | 2.3%                                | 0.7421         |
| CPAP (%)                         | 26 (10.1)              | 128 (9.9)                   | 0.4%                                | 0.9485         |
| Dialysis (%)                     | 2 (0.8)                | 14 (1.1)                    | 3.3%                                | 0.6508         |
| Hyperlipidemia (%)               | 198 (76.7)             | 979 (76.1)                  | 1.6%                                | 0.8161         |
| Anemia (%)                       | 44 (17.1)              | 228 (17.7)                  | 1.7%                                | 0.7991         |
| Cognitive impairment/dementia    | 5 (1.9)                | 27 (2.1)                    | 1.1%                                | 0.8692         |
| Frailty (%)                      | 9 (3.5)                | 45 (3.5)                    | 0.0%                                | 0.9948         |
| COPD (%)                         | 55 (21.3)              | 263 (20.4)                  | 2.2%                                | 0.7489         |
| Peripheral vascular disease (%)  | 40 (15.5)              | 213 (16.6)                  | 2.9%                                | 0.6785         |
| History of stroke/TIA (%)        | 37 (14.3)              | 189 (14.7)                  | 1.0%                                | 0.8864         |
| NYHA class (%)                   |                        |                             | 4.5%                                | 0.9810         |
| No HF                            | 126 (48.8)             | 612 (47.6)                  |                                     |                |
| Class I                          | 39 (15.1)              | 213 (16.6)                  |                                     |                |
| Class II                         | 54 (20.9)              | 271 (21.1)                  |                                     |                |
| Class III                        | 36 (14.0)              | 174 (13.5)                  |                                     |                |
| Class IV                         | 3 (1.2)                | 17 (1.3)                    |                                     |                |
| Etiology of cardiomyopathy       |                        |                             | 10.8%                               | 0.2902         |
| No HF                            | 126 (48.8)             | 611 (47.5)                  |                                     |                |
| Ischemic                         | 66 (25.6)              | 289 (22.5)                  |                                     |                |
| Non-inschemic                    | 66 (25.6)              | 387 (30.1)                  |                                     |                |
| HF hospitalizations in past year | 27 (10.5)              | 138 (10.7)                  | 0.8%                                | 0.9027         |
| Significant valvular disease (%) | 72 (27.9)              | 360 (28.0)                  | 0.1%                                | 0.9830         |

| <i>Variable</i>                                     | <i>MRA<br/>(N=258)</i> | <i>No MRA<br/>(N=1,287)</i> | <i>Standardize<br/>d difference</i> | <i>P-value</i> |
|-----------------------------------------------------|------------------------|-----------------------------|-------------------------------------|----------------|
| Prior valve replacement/repair (%)                  | 26 (10.1)              | 120 (9.3)                   | 2.5%                                | 0.7057         |
| History of CAD (%)                                  | 109 (42.2)             | 538 (41.8)                  | 0.9%                                | 0.8947         |
| Prior MI (%)                                        | 48 (18.6)              | 227 (17.6)                  | 2.5%                                | 0.7110         |
| History of PCI (%)                                  | 59 (22.9)              | 298 (23.2)                  | 0.7%                                | 0.9207         |
| Height (SD)                                         | 170 (12.2)             | 170 (12.2)                  | 0.3%                                | 0.9596         |
| Weight (SD)                                         | 90.7 (24.6)            | 91.8 (25.8)                 | 4.4%                                | 0.5270         |
| Heart Rate (SD)                                     | 70.8 (12.5)            | 71.2 (13.2)                 | 2.7%                                | 0.6966         |
| Systolic BP mmHg(SD)                                | 128 (20.6)             | 126 (17.6)                  | 9.7%                                | 0.1344         |
| Diastolic BP mmHg(SD)                               | 72.3 (12.1)            | 72.4 (10.7)                 | 0.8%                                | 0.9065         |
| Intraventricular conduction (%)                     |                        |                             | 1.4%                                | 0.9976         |
| None                                                | 174 (67.4)             | 869 (67.5)                  |                                     |                |
| RBBB                                                | 18 (7.0)               | 91 (7.1)                    |                                     |                |
| LBBB                                                | 15 (5.8)               | 78 (6.1)                    |                                     |                |
| Non-specific IVCD or unknown<br>ventricularly paced | 51 (19.8)              | 249 (19.3)                  |                                     |                |
| LVEF type (%)                                       |                        |                             | 7.0%                                | 0.7897         |
| Normal ( $\geq 50\%$ )                              | 156 (60.5)             | 765 (59.4)                  |                                     |                |
| Mild dysfunction ( $>40\%$ , $<50\%$ )              | 25 (9.7)               | 127 (9.9)                   |                                     |                |
| Moderate dysfunction ( $\geq 30\%$ to<br>40%)       | 48 (18.6)              | 269 (20.9)                  |                                     |                |
| Severe dysfunction ( $<30\%$ )                      | 29 (11.2)              | 126 (9.8)                   |                                     |                |
| Left atrial diameter type (%)                       |                        |                             | 3.0%                                | 0.9780         |
| Normal                                              | 67 (26.0)              | 346 (26.9)                  |                                     |                |
| Mild enlargement                                    | 64 (24.8)              | 315 (24.5)                  |                                     |                |
| Moderate enlargement                                | 68 (26.4)              | 345 (26.8)                  |                                     |                |
| Severe enlargement                                  | 59 (22.9)              | 281 (21.8)                  |                                     |                |
| eGFR mg/dL (SD)                                     | 66.3 (23.1)            | 65.6 (22.7)                 | 3.0%                                | 0.6614         |
| Hematocrit (SD)                                     | 39.1 (4.8)             | 39.1 (4.9)                  | 0.7%                                | 0.9171         |
| AF type (%)                                         |                        |                             | 1.5%                                | 0.8275         |
| Paroxysmal                                          | 193 (74.8)             | 971 (75.4)                  |                                     |                |
| Persistent                                          | 65 (25.2)              | 316 (24.6)                  |                                     |                |
| EHRA score                                          |                        |                             | 2.0%                                | 0.9935         |
| No symptoms                                         | 101 (39.1)             | 516 (40.1)                  |                                     |                |
| Mild                                                | 110 (42.6)             | 542 (42.1)                  |                                     |                |

| <i>Variable</i>                   | <i>MRA<br/>(N=258)</i> | <i>No MRA<br/>(N=1,287)</i> | <i>Standardize<br/>d difference</i> | <i>P-value</i> |
|-----------------------------------|------------------------|-----------------------------|-------------------------------------|----------------|
| Severe                            | 43 (16.7)              | 210 (16.3)                  |                                     |                |
| Disabling                         | 4 (1.6)                | 19 (1.5)                    |                                     |                |
| AF management strategy            |                        |                             | 1.8%                                | 0.7954         |
| Rate control                      | 145 (56.2)             | 712 (55.3)                  |                                     |                |
| Rhythm control                    | 113 (43.8)             | 575 (44.7)                  |                                     |                |
| Prior antiarrhythmic drug use (%) | 152 (58.9)             | 770 (59.8)                  | 1.9%                                | 0.7847         |
| AV node/HIS bundle ablation (%)   | 4 (1.6)                | 26 (2.0)                    | 3.5%                                | 0.6177         |
| AF duration                       | 59.6 (53.7)            | 59.4 (62.6)                 | 0.2%                                | 0.9753         |
| Functional status (%)             | 22 (8.5)               | 109 (8.5)                   | 0.2%                                | 0.9757         |
| Implanted device                  | 100 (38.8)             | 490 (38.1)                  | 1.4%                                | 0.8359         |
| Calcium channel blockers (%)      | 69 (26.7)              | 366 (28.4)                  | 3.8%                                | 0.5808         |
| Diuretics (%)                     | 179 (69.4)             | 896 (69.6)                  | 0.5%                                | 0.9392         |
| Statins (%)                       | 150 (58.1)             | 770 (59.8)                  | 3.4%                                | 0.6138         |
| Currently on Dabigatran (%)       | 21 (8.1)               | 125 (9.7)                   | 5.5%                                | 0.4305         |
| Currently on Warfarin (%)         | 171 (66.3)             | 827 (64.3)                  | 4.2%                                | 0.5355         |
| Currently on OAC (%)              | 192 (74.4)             | 951 (73.9)                  | 1.2%                                | 0.8605         |

AAD = antiarrhythmic drug, AF = atrial fibrillation, BMI = body mass index, CAD = coronary artery disease, CKD = chronic kidney disease, CPAP = continuous positive airway pressure, DBP = diastolic blood pressure, SBP = systolic blood pressure, eGFR = estimated glomerular filtration rate, HR = heart rate, MDRD = Modification of Diet in Renal Disease Study, LVEF = left ventricular ejection fraction, NYHA = New York Heart Association, OAC = oral anticoagulation, PCI = percutaneous coronary intervention, PVD = peripheral artery disease, SD = standard deviation, RBBB, right bundle branch block, LBBB left bundle branch block.

**Table S3. Standardized differences of propensity matched pairs: New MRA use. (New-onset HF matched pairs).**

| <i>Variable</i>                    | <i>MRA<br/>N=(120)</i> | <i>No MRA<br/>(N=600)</i> | <i>Standardized<br/>difference</i> | <i>P-value</i> |
|------------------------------------|------------------------|---------------------------|------------------------------------|----------------|
| Age (SD) years                     | 73.4 (10.1)            | 73.4 (10.0)               | 0.4%                               | 0.9709         |
| Female (%)                         | 70 (58.3)              | 354 (59.0)                | 1.4%                               | 0.8922         |
| Smoking (%)                        |                        |                           | 7.9%                               | 0.7311         |
| Non-smoker                         | 64 (53.3)              | 341 (56.8)                |                                    |                |
| Recent or former smoker            | 49 (40.8)              | 222 (37.0)                |                                    |                |
| Current Smoker                     | 7 (5.8)                | 37 (6.2)                  |                                    |                |
| Cancer (%)                         | 25 (20.8)              | 135 (22.5)                | 4.0%                               | 0.6885         |
| Hypertension (%)                   | 106 (88.3)             | 531 (88.5)                | 0.5%                               | 0.9584         |
| Diabetes (%)                       | 27 (22.5)              | 127 (21.2)                | 3.2%                               | 0.7451         |
| Obstructive sleep apnea (%)        | 17 (14.2)              | 67 (11.2)                 | 9.0%                               | 0.3500         |
| CPAP (%)                           | 8 (6.7)                | 31 (5.2)                  | 6.4%                               | 0.5075         |
| Dialysis (%)                       | 1 (0.8)                | 5 (0.8)                   | 0.0%                               | 0.9999         |
| Hyperlipidemia (%)                 | 89 (74.2)              | 440 (73.3)                | 1.9%                               | 0.8503         |
| Anemia (%)                         | 19 (15.8)              | 76 (12.7)                 | 9.1%                               | 0.3494         |
| Cognitive impairment/dementia      | 4 (3.3)                | 21 (3.5)                  | 0.9%                               | 0.9275         |
| Frailty (%)                        | 6 (5.0)                | 20 (3.3)                  | 8.3%                               | 0.3717         |
| COPD (%)                           | 16 (13.3)              | 79 (13.2)                 | 0.5%                               | 0.9607         |
| Peripheral vascular disease (%)    | 17 (14.2)              | 82 (13.7)                 | 1.4%                               | 0.8846         |
| History of stroke/TIA (%)          | 15 (12.5)              | 77 (12.8)                 | 1.0%                               | 0.9205         |
| Significant valvular disease (%)   | 23 (19.2)              | 104 (17.3)                | 4.7%                               | 0.6305         |
| Prior valve replacement/repair (%) | 9 (7.5)                | 45 (7.5)                  | 0.0%                               | 0.9999         |
| History of CAD (%)                 | 35 (29.2)              | 172 (28.7)                | 1.1%                               | 0.9120         |
| Prior MI (%)                       | 10 (8.3)               | 40 (6.7)                  | 6.3%                               | 0.5121         |
| History of PCI (%)                 | 20 (16.7)              | 93 (15.5)                 | 3.2%                               | 0.7484         |
| Height (SD)                        | 168 (13.5)             | 168 (11.8)                | 2.3%                               | 0.8075         |
| Weight (SD)                        | 88.0 (23.1)            | 87.5 (24.7)               | 2.3%                               | 0.8194         |
| Heart Rate (SD)                    | 70.4 (13.6)            | 69.3 (12.5)               | 8.1%                               | 0.4062         |
| Systolic BP mmHg(SD)               | 134 (22.2)             | 130 (17.1)                | 17.4%                              | 0.0573         |
| Diastolic BP mmHg(SD)              | 74.5 (12.0)            | 74.3 (10.7)               | 1.1%                               | 0.9088         |

| <i>Variable</i>                                     | <i>MRA<br/>N=(120)</i> | <i>No MRA<br/>(N=600)</i> | <i>Standardized<br/>difference</i> | <i>P-value</i> |
|-----------------------------------------------------|------------------------|---------------------------|------------------------------------|----------------|
| Intraventricular conduction (%)                     |                        |                           | 4.6%                               | 0.9720         |
| None                                                | 91 (75.8)              | 455 (75.8)                |                                    |                |
| RBBB                                                | 10 (8.3)               | 49 (8.2)                  |                                    |                |
| LBBB                                                | 2 (1.7)                | 7 (1.2)                   |                                    |                |
| Non-specific IVCD or unknown<br>ventricularly paced | 17 (14.2)              | 89 (14.8)                 |                                    |                |
| LVEF type (%)                                       |                        |                           | 8.6%                               | 0.8245         |
| Normal ( $\geq 50\%$ )                              | 97 (80.8)              | 487 (81.2)                |                                    |                |
| Mild dysfunction ( $>40\%$ , $<50\%$ )              | 13 (10.8)              | 72 (12.0)                 |                                    |                |
| Moderate dysfunction ( $\geq 30\%$ to<br>$40\%$ )   | 8 (6.7)                | 36 (6.0)                  |                                    |                |
| Severe dysfunction ( $<30\%$ )                      | 2 (1.7)                | 5 (0.8)                   |                                    |                |
| Left atrial diameter type (%)                       |                        |                           | 14.3%                              | 0.5260         |
| Normal                                              | 37 (30.8)              | 200 (33.3)                |                                    |                |
| Mild enlargement                                    | 28 (23.3)              | 146 (24.3)                |                                    |                |
| Moderate enlargement                                | 33 (27.5)              | 175 (29.2)                |                                    |                |
| Severe enlargement                                  | 22 (18.3)              | 79 (13.2)                 |                                    |                |
| eGFR mg/dL (SD)                                     | 67.9 (21.4)            | 67.2 (21.6)               | 3.3%                               | 0.7455         |
| Hematocrit (SD)                                     | 39.7 (4.8)             | 39.9 (4.6)                | 3.9%                               | 0.6897         |
| AF type (%)                                         |                        |                           | 0.4%                               | 0.9667         |
| Paroxysmal                                          | 96 (80.0)              | 481 (80.2)                |                                    |                |
| Persistent                                          | 24 (20.0)              | 119 (19.8)                |                                    |                |
| EHRA score                                          |                        |                           | 2.0%                               | 0.9978         |
| No symptoms                                         | 51 (42.5)              | 261 (43.5)                |                                    |                |
| Mild                                                | 54 (45.0)              | 265 (44.2)                |                                    |                |
| Severe                                              | 14 (11.7)              | 69 (11.5)                 |                                    |                |
| Disabling                                           | 1 (0.8)                | 5 (0.8)                   |                                    |                |
| AF management strategy                              |                        |                           | 5.3%                               | 0.5927         |
| Rate control                                        | 62 (51.7)              | 326 (54.3)                |                                    |                |
| Rhythm control                                      | 58 (48.3)              | 274 (45.7)                |                                    |                |
| Prior antiarrhythmic drug use (%)                   | 78 (65.0)              | 397 (66.2)                | 2.5%                               | 0.8055         |
| AV node/HIS bundle ablation (%)                     | 56.2 (45.8)            | 56.7 (50.2)               | 1.0%                               | 0.9228         |
| AF duration (%)                                     | 9 (7.5)                | 42 (7.0)                  | 1.9%                               | 0.8455         |
| Functional status (%)                               | 22 (18.3)              | 113 (18.8)                | 1.3%                               | 0.8981         |
| Implanted device                                    | 42 (35.0)              | 217 (36.2)                | 2.4%                               | 0.8079         |

| <i>Variable</i>              | <i>MRA<br/>N=(120)</i> | <i>No MRA<br/>(N=600)</i> | <i>Standardized<br/>difference</i> | <i>P-value</i> |
|------------------------------|------------------------|---------------------------|------------------------------------|----------------|
| Calcium channel blockers (%) | 69 (57.5)              | 355 (59.2)                | 3.4%                               | 0.7348         |
| Diuretics (%)                | 66 (55.0)              | 322 (53.7)                | 2.7%                               | 0.7891         |
| Statins (%)                  | 78 (65.0)              | 397 (66.2)                | 2.5%                               | 0.8055         |
| Currently on Dabigatran (%)  | 12 (10.0)              | 44 (7.3)                  | 9.5%                               | 0.3194         |
| Currently on Warfarin (%)    | 75 (62.5)              | 394 (65.7)                | 6.6%                               | 0.5064         |
| Currently on OAC (%)         | 87 (72.5)              | 438 (73.0)                | 1.1%                               | 0.9104         |

AAD = antiarrhythmic drug, AF = atrial fibrillation, BMI = body mass index, CAD = coronary artery disease, CKD = chronic kidney disease, CPAP = continuous positive airway pressure, DBP = diastolic blood pressure, SBP = systolic blood pressure, eGFR = estimated glomerular filtration rate, HR = heart rate, MDRD = Modification of Diet in Renal Disease Study, LVEF = left ventricular ejection fraction, NYHA = New York Heart Association, OAC = oral anticoagulation, PCI = percutaneous coronary intervention, PVD = peripheral artery disease, SD = standard deviation, RBBB, right bundle branch block, LBBB left bundle branch block.



**Table S4. Standardized differences of propensity matched pairs: New and baseline MRA use combined.**

| <i>Variable</i>                  | <i>MRA</i>     | <i>No MRA</i>    | <i>Standardized</i> |                |
|----------------------------------|----------------|------------------|---------------------|----------------|
|                                  | <i>(N=534)</i> | <i>(N=2,658)</i> | <i>difference</i>   | <i>P-value</i> |
| Age (SD) years                   | 72.4 (11.4)    | 72.6 (11.4)      | 2.0%                | 0.6736         |
| Female (%)                       | 254 (47.6)     | 1,258 (47.3)     | 0.5%                | 0.9204         |
| Smoking (%)                      |                |                  | 5.5%                | 0.5281         |
| Non-smoker                       | 265 (49.6)     | 1,327 (49.9)     |                     |                |
| Recent or former smoker          | 237 (44.4)     | 1,138 (42.8)     |                     |                |
| Current Smoker                   | 32 (6.0)       | 193 (7.3)        |                     |                |
| Cancer (%)                       | 111 (20.8)     | 548 (20.6)       | 0.4%                | 0.9296         |
| Hypertension (%)                 | 476 (89.1)     | 2,366 (89.0)     | 0.4%                | 0.9332         |
| Diabetes (%)                     | 196 (36.7)     | 968 (36.4)       | 0.6%                | 0.9004         |
| Obstructive sleep apnea (%)      | 129 (24.2)     | 641 (24.1)       | 0.1%                | 0.9837         |
| CPAP (%)                         | 74 (13.9)      | 361 (13.6)       | 0.8%                | 0.8703         |
| Dialysis (%)                     | 3 (0.6)        | 21 (0.8)         | 2.8%                | 0.5774         |
| Hyperlipidemia (%)               | 407 (76.2)     | 2,014 (75.8)     | 1.0%                | 0.8261         |
| Anemia (%)                       | 113 (21.2)     | 579 (21.8)       | 1.5%                | 0.7502         |
| Cognitive impairment/dementia    | 15 (2.8)       | 74 (2.8)         | 0.2%                | 0.9745         |
| Frailty (%)                      | 29 (5.4)       | 156 (5.9)        | 2.0%                | 0.6797         |
| COPD (%)                         | 112 (21.0)     | 553 (20.8)       | 0.4%                | 0.9302         |
| Peripheral vascular disease (%)  | 81 (15.2)      | 418 (15.7)       | 1.5%                | 0.7461         |
| History of stroke/TIA (%)        | 91 (17.0)      | 460 (17.3)       | 0.7%                | 0.8824         |
| NYHA class (%)                   |                |                  | 3.7%                | 0.9600         |
| No HF                            | 222 (41.7)     | 1,099 (41.4)     |                     |                |
| Class I                          | 85 (15.9)      | 445 (16.8)       |                     |                |
| Class II                         | 136 (25.5)     | 691 (26.0)       |                     |                |
| Class III                        | 83 (15.6)      | 383 (14.4)       |                     |                |
| Class IV                         | 7 (1.3)        | 35 (1.3)         |                     |                |
| Etiology of cardiomyopathy       |                |                  | 4.5%                | 0.6393         |
| No HF                            | 222 (41.6)     | 1,098 (41.4)     |                     |                |
| Ischemic                         | 144 (27.0)     | 673 (25.4)       |                     |                |
| Non-inschemic                    | 168 (31.5)     | 883 (33.3)       |                     |                |
| HF hospitalizations in past year | 65 (12.2)      | 314 (11.8)       | 1.1%                | 0.8150         |

| <i>Variable</i>                                     | <i>MRA<br/>(N=534)</i> | <i>No MRA<br/>(N=2,658)</i> | <i>Standardized<br/>difference</i> | <i>P-value</i> |
|-----------------------------------------------------|------------------------|-----------------------------|------------------------------------|----------------|
| Significant valvular disease (%)                    | 150 (28.1)             | 759 (28.6)                  | 1.0%                               | 0.8278         |
| Prior valve replacement/repair (%)                  | 60 (11.2)              | 299 (11.2)                  | 0.0%                               | 0.9930         |
| History of CAD (%)                                  | 235 (44.0)             | 1,161 (43.7)                | 0.7%                               | 0.8891         |
| Prior MI (%)                                        | 114 (21.3)             | 540 (20.3)                  | 2.5%                               | 0.5897         |
| History of PCI (%)                                  | 116 (21.7)             | 578 (21.7)                  | 0.1%                               | 0.9907         |
| Height (SD)                                         | 170 (11.6)             | 170 (12.2)                  | 0.6%                               | 0.9046         |
| Weight (SD)                                         | 90.9 (25.7)            | 91.1 (26.4)                 | 0.8%                               | 0.8606         |
| Heart Rate (SD)                                     | 71.9 (12.3)            | 72.3 (13.1)                 | 3.2%                               | 0.5132         |
| Systolic BP mmHg(SD)                                | 125 (20.0)             | 124 (17.8)                  | 4.9%                               | 0.2835         |
| Diastolic BP mmHg(SD)                               | 71.5 (11.4)            | 71.4 (10.9)                 | 0.9%                               | 0.8436         |
| Intraventricular conduction (%)                     |                        |                             | 2.0%                               | 0.9826         |
| None                                                | 341 (64.5)             | 1,710 (64.5)                |                                    |                |
| RBBB                                                | 42 (7.9)               | 208 (7.8)                   |                                    |                |
| LBBB                                                | 34 (6.4)               | 182 (6.9)                   |                                    |                |
| Non-specific IVCD or unknown<br>ventricularly paced | 112 (21.2)             | 550 (20.8)                  |                                    |                |
| LVEF type (%)                                       |                        |                             | 5.6%                               | 0.7061         |
| Normal ( $\geq 50\%$ )                              | 300 (58.5)             | 1,519 (59.2)                |                                    |                |
| Mild dysfunction ( $>40\%$ , $<50\%$ )              | 43 (8.4)               | 223 (8.7)                   |                                    |                |
| Moderate dysfunction ( $\geq 30\%$ to<br>40%)       | 105 (20.5)             | 546 (21.3)                  |                                    |                |
| Severe dysfunction ( $<30\%$ )                      | 65 (12.7)              | 280 (10.9)                  |                                    |                |
| Left atrial diameter type (%)                       |                        |                             | 1.6%                               | 0.9912         |
| Normal                                              | 115 (23.0)             | 567 (22.5)                  |                                    |                |
| Mild enlargement                                    | 127 (25.4)             | 638 (25.3)                  |                                    |                |
| Moderate enlargement                                | 130 (26.0)             | 652 (25.9)                  |                                    |                |
| Severe enlargement                                  | 128 (25.6)             | 660 (26.2)                  |                                    |                |
| eGFR mg/dL (SD)                                     | 64.2 (23.4)            | 63.9 (22.9)                 | 1.5%                               | 0.7606         |
| Hematocrit (SD)                                     | 39.2 (4.9)             | 39.2 (5.0)                  | 0.5%                               | 0.9134         |
| AF type (%)                                         |                        |                             | 2.2%                               | 0.9050         |
| First detected / new onset                          | 5 (0.9)                | 30 (1.1)                    |                                    |                |
| Paroxysmal                                          | 381 (71.3)             | 1,905 (71.7)                |                                    |                |
| Persistent                                          | 148 (27.7)             | 723 (27.2)                  |                                    |                |
| EHRA score                                          |                        |                             | 1.9%                               | 0.9834         |

| <i>Variable</i>                   | <i>MRA<br/>(N=534)</i> | <i>No MRA<br/>(N=2,658)</i> | <i>Standardized<br/>difference</i> | <i>P-value</i> |
|-----------------------------------|------------------------|-----------------------------|------------------------------------|----------------|
| No symptoms                       | 190 (35.6)             | 955 (36.1)                  |                                    |                |
| Mild                              | 236 (44.2)             | 1,169 (44.2)                |                                    |                |
| Severe                            | 98 (18.4)              | 479 (18.1)                  |                                    |                |
| Disabling                         | 10 (1.9)               | 44 (1.7)                    |                                    |                |
| AF management strategy            |                        |                             | 0.8%                               | 0.8686         |
| Rate control                      | 315 (59.1)             | 1,560 (58.7)                |                                    |                |
| Rhythm control                    | 218 (40.9)             | 1,097 (41.3)                |                                    |                |
| Prior antiarrhythmic drug use (%) | 297 (55.6)             | 1,499 (56.4)                | 1.6%                               | 0.7409         |
| AV node/HIS bundle ablation (%)   | 17 (3.2)               | 85 (3.2)                    | 0.1%                               | 0.9863         |
| AF duration (%)                   | 63.9 (66.7)            | 64.6 (72.5)                 | 1.0%                               | 0.8387         |
| Functional status (%)             | 53 (9.9)               | 276 (10.4)                  | 1.5%                               | 0.7484         |
| Implanted device                  | 224 (41.9)             | 1,097 (41.3)                | 1.4%                               | 0.7723         |
| Calcium channel blockers (%)      | 124 (23.2)             | 657 (24.7)                  | 3.5%                               | 0.4628         |
| Diuretics (%)                     | 378 (70.8)             | 1,874 (70.5)                | 0.6%                               | 0.8961         |
| Statins (%)                       | 303 (56.7)             | 1,505 (56.6)                | 0.2%                               | 0.9593         |
| Currently on Dabigatran (%)       | 30 (5.6)               | 195 (7.3)                   | 7.0%                               | 0.1569         |
| Currently on Warfarin (%)         | 381 (71.3)             | 1,810 (68.1)                | 7.1%                               | 0.1394         |
| Currently on OAC (%)              | 411 (77.0)             | 2,004 (75.4)                | 3.7%                               | 0.4401         |

AAD = antiarrhythmic drug, AF = atrial fibrillation, BMI = body mass index, CAD = coronary artery disease, CKD = chronic kidney disease, CPAP = continuous positive airway pressure, DBP = diastolic blood pressure, SBP = systolic blood pressure, eGFR = estimated glomerular filtration rate, HR = heart rate, MDRD = Modification of Diet in Renal Disease Study, LVEF = left ventricular ejection fraction, NYHA = New York Heart Association, OAC = oral anticoagulation, PCI = percutaneous coronary intervention, PVD = peripheral artery disease, SD = standard deviation, RBBB, right bundle branch block, LBBB left bundle branch block.

**Table S5. Standardized differences of propensity matched pairs: New and baseline MRA use combined (New-onset HF matched pairs).**

| Variable                                  | MRA            | No MRA      | Standardized |         |
|-------------------------------------------|----------------|-------------|--------------|---------|
|                                           | (N=205)        | (N=1,019)   | difference   | P-value |
| Age (SD) years                            | 73.0<br>(11.0) | 73.3 (10.7) | 2.5%         | 0.7385  |
| Female (%)                                | 118 (57.6)     | 607 (59.6)  | 4.1%         | 0.5936  |
| Smoking (%)                               |                |             | 4.6%         | 0.8339  |
| Non-smoker                                | 113 (55.1)     | 583 (57.2)  |              |         |
| Recent or former smoker                   | 80 (39.0)      | 375 (36.8)  |              |         |
| Current Smoker                            | 12 (5.9)       | 61 (6.0)    |              |         |
| Cancer (%)                                | 37 (18.0)      | 193 (18.9)  | 2.3%         | 0.7656  |
| Hypertension (%)                          | 186 (90.7)     | 936 (91.9)  | 4.0%         | 0.5955  |
| Diabetes (%)                              | 48 (23.4)      | 240 (23.6)  | 0.3%         | 0.9661  |
| Obstructive sleep apnea (%)               | 45 (22.0)      | 202 (19.8)  | 5.2%         | 0.4885  |
| CPAP (%)                                  | 25 (12.2)      | 110 (10.8)  | 4.4%         | 0.5593  |
| Dialysis (%)                              | 2 (1.0)        | 10 (1.0)    | 0.1%         | 0.9939  |
| Hyperlipidemia (%)                        | 146 (71.2)     | 729 (71.5)  | 0.7%         | 0.9259  |
| Anemia (%)                                | 32 (15.6)      | 144 (14.1)  | 4.2%         | 0.5821  |
| Cognitive impairment/dementia             | 10 (4.9)       | 44 (4.3)    | 2.7%         | 0.7216  |
| Frailty (%)                               | 12 (5.9)       | 59 (5.8)    | 0.2%         | 0.9742  |
| Chronic obstructive pulmonary disease (%) | 26 (12.7)      | 121 (11.9)  | 2.5%         | 0.7452  |
| Peripheral vascular disease (%)           | 21 (10.2)      | 112 (11.0)  | 2.4%         | 0.7538  |
| History of stroke/TIA (%)                 | 30 (14.6)      | 166 (16.3)  | 4.6%         | 0.5552  |
| Significant valvular disease (%)          | 35 (17.1)      | 173 (17.0)  | 0.3%         | 0.9734  |
| Prior valve replacement/repair (%)        | 16 (7.8)       | 80 (7.9)    | 0.2%         | 0.9822  |
| History of CAD (%)                        | 60 (29.3)      | 288 (28.3)  | 2.2%         | 0.7709  |
| Prior myocardial infarction (%)           | 21 (10.2)      | 91 (8.9)    | 4.5%         | 0.5517  |
| History of PCI (%)                        | 26 (12.7)      | 127 (12.5)  | 0.7%         | 0.9308  |
| Height (SD)                               | 169 (12.5)     | 168 (12.1)  | 4.9%         | 0.5194  |
| Weight (SD)                               | 88.9<br>(25.3) | 88.6 (25.9) | 1.1%         | 0.8900  |

| <i>Variable</i>                                     | <i>MRA</i>     | <i>No MRA</i>    | <i>Standardized</i> |                |
|-----------------------------------------------------|----------------|------------------|---------------------|----------------|
|                                                     | <i>(N=205)</i> | <i>(N=1,019)</i> | <i>difference</i>   | <i>P-value</i> |
| Heart Rate (SD)                                     | 71.5<br>(12.6) | 71.6 (13.3)      | 0.8%                | 0.9141         |
| Systolic BP mmHg(SD)                                | 130 (21.5)     | 128 (18.1)       | 8.7%                | 0.2283         |
| Diastolic BP mmHg(SD)                               | 73.9<br>(10.8) | 73.7 (11.0)      | 1.7%                | 0.8274         |
| Intraventricular conduction (%)                     |                |                  | 1.1%                | 0.9992         |
| None                                                | 155 (75.6)     | 773 (76.1)       |                     |                |
| RBBB                                                | 14 (6.8)       | 68 (6.7)         |                     |                |
| LBBB                                                | 8 (3.9)        | 39 (3.8)         |                     |                |
| Non-specific IVCD or unknown<br>ventricularly paced | 28 (13.7)      | 136 (13.4)       |                     |                |
| LVEF type (%)                                       |                |                  | 6.0%                | 0.8900         |
| Normal ( $\geq 50\%$ )                              | 157 (80.1)     | 795 (82.0)       |                     |                |
| Mild dysfunction ( $>40\%$ , $<50\%$ )              | 20 (10.2)      | 92 (9.5)         |                     |                |
| Moderate dysfunction ( $\geq 30\%$ to<br>$40\%$ )   | 15 (7.7)       | 68 (7.0)         |                     |                |
| Severe dysfunction ( $<30\%$ )                      | 4 (2.0)        | 14 (1.4)         |                     |                |
| Left atrial diameter type (%)                       |                |                  | 4.4%                | 0.9578         |
| Normal                                              | 57 (29.4)      | 288 (30.3)       |                     |                |
| Mild enlargement                                    | 50 (25.8)      | 240 (25.2)       |                     |                |
| Moderate enlargement                                | 49 (25.3)      | 251 (26.4)       |                     |                |
| Severe enlargement                                  | 38 (19.6)      | 173 (18.2)       |                     |                |
| eGFR mg/dL (SD)                                     | 65.7<br>(22.1) | 65.0 (22.8)      | 2.9%                | 0.7158         |
| Hematocrit (SD)                                     | 40.1 (4.8)     | 40.0 (4.7)       | 1.7%                | 0.8251         |
| AF type (%)                                         |                |                  | 2.4%                | 0.9543         |
| First detected / new onset                          | 2 (1.0)        | 12 (1.2)         |                     |                |
| Paroxysmal                                          | 160 (78.0)     | 788 (77.3)       |                     |                |
| Persistent                                          | 43 (21.0)      | 219 (21.5)       |                     |                |
| EHRA score                                          |                |                  | 4.5%                | 0.9515         |
| No symptoms                                         | 81 (39.5)      | 422 (41.5)       |                     |                |
| Mild                                                | 89 (43.4)      | 435 (42.7)       |                     |                |
| Severe                                              | 32 (15.6)      | 147 (14.4)       |                     |                |
| Disabling                                           | 3 (1.5)        | 14 (1.4)         |                     |                |
| AF management strategy                              |                |                  | 4.1%                | 0.5900         |

| <i>Variable</i>                   | <i>MRA</i>     | <i>No MRA</i>    | <i>Standardized</i> |                |
|-----------------------------------|----------------|------------------|---------------------|----------------|
|                                   | <i>(N=205)</i> | <i>(N=1,019)</i> | <i>difference</i>   | <i>P-value</i> |
| Rate control                      | 112 (54.6)     | 577 (56.7)       |                     |                |
| Rhythm control                    | 93 (45.4)      | 441 (43.3)       |                     |                |
| Prior antiarrhythmic drug use (%) | 127 (62.0)     | 633 (62.1)       | 0.3%                | 0.9638         |
| AV node/HIS bundle ablation (%)   | 0 (0.0)        | 3 (0.3)          | 7.7%                | 0.4367         |
| AF duration (%)                   | 60.0<br>(47.8) | 60.1 (60.1)      | 0.1%                | 0.9870         |
| Functional status (%)             | 19 (9.3)       | 100 (9.8)        | 1.9%                | 0.8100         |
| Implanted device                  | 45 (22.0)      | 217 (21.3)       | 1.6%                | 0.8345         |
| Calcium channel blockers (%)      | 71 (34.6)      | 353 (34.6)       | 0.0%                | 0.9983         |
| Diuretics (%)                     | 118 (57.6)     | 577 (56.6)       | 1.9%                | 0.8049         |
| Statins (%)                       | 100 (48.8)     | 489 (48.0)       | 1.6%                | 0.8359         |
| Currently on Dabigatran (%)       | 16 (7.8)       | 70 (6.9)         | 3.6%                | 0.6326         |
| Currently on Warfarin (%)         | 136 (66.3)     | 688 (67.5)       | 2.5%                | 0.7433         |
| Currently on OAC (%)              | 152 (74.1)     | 757 (74.3)       | 0.3%                | 0.9661         |

AAD = antiarrhythmic drug, AF = atrial fibrillation, BMI = body mass index, CAD = coronary artery disease, CKD = chronic kidney disease, CPAP = continuous positive airway pressure, DBP = diastolic blood pressure, SBP = systolic blood pressure, eGFR = estimated glomerular filtration rate, HR = heart rate, MDRD = Modification of Diet in Renal Disease Study, LVEF = left ventricular ejection fraction, NYHA = New York Heart Association, OAC = oral anticoagulation, PCI = percutaneous coronary intervention, PVD = peripheral artery disease, SD = standard deviation, RBBB, right bundle branch block, LBBB left bundle branch block.

**Table S6. Predictors of new MRA use.**

| <i>Characteristic</i>                                                      | <i>OR (95% CI)</i> | <i>P</i> |
|----------------------------------------------------------------------------|--------------------|----------|
| Age (truncated at 70 years)                                                | 0.96 (0.94-0.98)   | 0.0003   |
| Female                                                                     | 1.03 (0.73-1.45)   | 0.8733   |
| Current smoker                                                             | 1.00 (0.81-1.24)   | 0.997    |
| Cancer                                                                     | 0.94 (0.69-1.27)   | 0.6883   |
| Hypertension                                                               | 2.06 (1.35-3.12)   | 0.0007   |
| Diabetes                                                                   | 1.02 (0.78-1.33)   | 0.8896   |
| Dialysis                                                                   | 0.29 (0.06-1.33)   | 0.1111   |
| Hyperlipidemia                                                             | 1.16 (0.84-1.59)   | 0.3769   |
| Anemia                                                                     | 1.29 (0.94-1.76)   | 0.1157   |
| Cognitive impairment/Dementia                                              | 0.98 (0.50-1.95)   | 0.9622   |
| Frailty                                                                    | 1.15 (0.70-1.88)   | 0.5831   |
| Chronic obstructive pulmonary disease                                      | 0.89 (0.64-1.23)   | 0.4815   |
| Peripheral vascular disease                                                | 0.83 (0.57-1.19)   | 0.3052   |
| Stroke or transient ischemic attack                                        | 1.43 (1.04-1.95)   | 0.0275   |
| Heart failure / Functional Status                                          |                    |          |
| No Heart Failure                                                           | Reference          |          |
| NYHA Class I                                                               | 0.41 (0.08-2.07)   | 0.2802   |
| NYHA Class II                                                              | 0.48 (0.09-2.41)   | 0.371    |
| NYHA Class III                                                             | 0.62 (0.12-3.16)   | 0.5627   |
| NYHA Class IV                                                              | 0.64 (0.09-4.29)   | 0.6421   |
| Significant valvular disease                                               | 0.69 (0.51-0.94)   | 0.0194   |
| Prior valve replacement/repair                                             | 1.36 (0.91-2.04)   | 0.1355   |
| History of coronary artery disease                                         | 1.05 (0.73-1.51)   | 0.8011   |
| Prior myocardial infarction                                                | 0.95 (0.65-1.38)   | 0.7728   |
| Prior percutaneous coronary intervention                                   | 0.78 (0.54-1.12)   | 0.1794   |
| Height, cm                                                                 | 0.99 (0.97-1.00)   | 0.0292   |
| Weight, kg                                                                 | 1.00 (0.99-1.01)   | 0.8898   |
| Heart rate (truncated at 70 beats per minute)                              | 1.03 (1.01-1.06)   | 0.0105   |
| Systolic blood pressure (truncated at 125 mmHg)                            | 0.97 (0.96-0.98)   | <.0001   |
| Diastolic blood pressure                                                   | 1.00 (0.98-1.01)   | 0.5644   |
| Intraventricular conduction                                                |                    |          |
| Right bundle branch block                                                  | Reference          |          |
| Left bundle branch block                                                   |                    | 0.5076   |
| Left bundle branch block – Heart failure interaction                       |                    | 0.5272   |
| Non-specific intraventricular conduction delay                             |                    | 0.134    |
| Non-specific intraventricular conduction delay – heart failure interaction |                    | 0.3964   |
| Unknown-ventricularly paced                                                |                    | 0.3051   |

|                                                         |                  |        |
|---------------------------------------------------------|------------------|--------|
| Unknown-ventricularly paced – heart failure interaction |                  | 0.0068 |
| Left ventricular ejection fraction                      |                  |        |
| Normal                                                  |                  |        |
| Mild dysfunction                                        | 1.02 (0.64-1.61) | 0.9412 |
| Moderate dysfunction                                    | 2.27 (1.61-3.21) | <.0001 |
| Severe dysfunction                                      | 1.93 (1.24-3.00) | 0.0038 |
| Left atrial diameter                                    |                  |        |
| Normal                                                  | Reference        |        |
| Mild enlargement                                        |                  | 0.9684 |
| Mild enlargement – heart failure interaction            |                  | 0.2529 |
| Moderate enlargement                                    |                  | 0.6164 |
| Moderate enlargement – heart failure interaction        |                  | 0.2648 |
| Severe enlargement                                      |                  | 0.1105 |
| Severe enlargement – heart failure interaction          |                  | 0.8627 |
| eGFR ≤50                                                | 1.00 (0.98-1.03) | 0.7186 |
| 50 < eGFR ≤ 90                                          | 0.98 (0.97-0.99) | <.0001 |
| eGFR >90                                                | 1.01 (0.99-1.02) | 0.2521 |
| Hematocrit, %                                           | 1.02 (0.99-1.05) | 0.1925 |
| AF type                                                 |                  |        |
| First detected/New onset                                | Reference        |        |
| Paroxysmal                                              |                  | 0.2455 |
| Paroxysmal – heart failure interaction                  |                  | 0.1314 |
| Persistent                                              |                  | 0.2827 |
| Persistent – heart failure interaction                  |                  | 0.1336 |
| EHRA Score                                              |                  |        |
| No symptoms                                             | Reference        |        |
| Mild                                                    | 0.97 (0.73-1.29) | 0.8495 |
| Severe                                                  | 0.92 (0.64-1.33) | 0.6712 |
| Disabling                                               | 0.48 (0.20-1.18) | 0.1093 |
| Rhythm control                                          | 0.97 (0.74-1.28) | 0.8361 |
| Antiarrhythmic drug use in past                         | 1.10 (0.84-1.44) | 0.4983 |
| AV node/HIS bundle ablation                             | 2.54 (1.44-4.47) | 0.0013 |
| AF duration, months                                     | 1.00 (1.00-1.00) | 0.2863 |
| Functional status: not living independently             | 0.94 (0.62-1.42) | 0.7682 |
| Implanted device                                        | 1.10 (0.82-1.47) | 0.5397 |
| Obstructive sleep apnea                                 | 1.69 (1.12-2.54) | 0.0122 |
| On continuous positive airway pressure                  | 1.10 (0.68-1.76) | 0.7055 |
| Statin                                                  | 0.75 (0.57-0.99) | 0.0445 |



|                          |                  |        |
|--------------------------|------------------|--------|
| Diuretic                 | 1.71 (1.28-2.29) | 0.0002 |
| Calcium channel blockers | 0.68 (0.50-0.92) | 0.014  |

---

AF = atrial fibrillation, CAD = coronary artery disease, CKD = chronic kidney disease, COPD = chronic obstructive pulmonary disease, CPAP = continuous positive airway pressure, eGFR = estimated glomerular filtration rate, HF = heart failure, HR = heart rate, LVEF = left ventricular ejection fraction, LAD = left atrial dimension, EHRA = European heart rhythm association, NYHA = New York Heart Association, PCI = percutaneous coronary intervention, MI = Myocardial infarction.

**Table S7. Predictors of new and baseline MRA use.**

| <i>Characteristic</i>                                                      | <i>OR (95% CI)</i> | <i>P</i> |
|----------------------------------------------------------------------------|--------------------|----------|
| Age (truncated at 70 years)                                                | 0.98 (0.96-1.01)   | 0.1938   |
| Female                                                                     | 1.43 (1.00-2.05)   | 0.0503   |
| Current smoker                                                             | 1.07 (0.86-1.33)   | 0.5325   |
| Cancer                                                                     | 0.91 (0.66-1.24)   | 0.5417   |
| Hypertension                                                               | 1.38 (0.92-2.06)   | 0.1176   |
| Diabetes                                                                   | 1.16 (0.88-1.53)   | 0.2987   |
| Dialysis                                                                   | 0.59 (0.14-2.59)   | 0.4865   |
| Hyperlipidemia                                                             | 1.18 (0.85-1.64)   | 0.3243   |
| Anemia                                                                     | 0.73 (0.51-1.04)   | 0.0845   |
| Cognitive impairment/Dementia                                              | 0.84 (0.34-2.10)   | 0.7144   |
| Frailty                                                                    | 0.60 (0.30-1.20)   | 0.1469   |
| Chronic obstructive pulmonary disease                                      | 1.22 (0.87-1.69)   | 0.2438   |
| Peripheral vascular disease                                                | 1.17 (0.82-1.66)   | 0.3993   |
| Stroke or transient ischemic attack                                        | 0.91 (0.64-1.31)   | 0.6246   |
| Heart failure / Functional Status                                          |                    |          |
| No Heart Failure                                                           | Reference          |          |
| NYHA Class I                                                               | 0.61 (0.23-1.57)   | 0.3041   |
| NYHA Class II                                                              | 0.63 (0.24-1.61)   | 0.3306   |
| NYHA Class III                                                             | 1.01 (0.38-2.68)   | 0.9826   |
| NYHA Class IV                                                              | 1.81 (0.45-7.22)   | 0.4032   |
| Significant valvular disease                                               | 1.01 (0.75-1.38)   | 0.9285   |
| Prior valve replacement/repair                                             | 1.03 (0.66-1.62)   | 0.8977   |
| History of coronary artery disease                                         | 0.91 (0.62-1.34)   | 0.6364   |
| Prior myocardial infarction                                                | 0.81 (0.54-1.20)   | 0.2923   |
| Prior percutaneous coronary intervention                                   | 1.17 (0.80-1.72)   | 0.4254   |
| Height, cm                                                                 | 1.00 (0.99-1.02)   | 0.8672   |
| Weight, kg                                                                 | 1.00 (0.99-1.01)   | 0.7088   |
| Heart rate (truncated at 70 beats per minute)                              | 0.99 (0.97-1.01)   | 0.4747   |
| Systolic blood pressure (truncated at 125 mmHg)                            | 0.99 (0.98-1.01)   | 0.2458   |
| Diastolic blood pressure                                                   | 1.00 (0.99-1.02)   | 0.8614   |
| Intraventricular conduction                                                |                    |          |
| Right bundle branch block                                                  | Reference          |          |
| Left bundle branch block                                                   |                    | 0.6302   |
| Left bundle branch block – Heart failure interaction                       |                    | 0.1495   |
| Non-specific intraventricular conduction delay                             |                    | 0.5633   |
| Non-specific intraventricular conduction delay – heart failure interaction |                    | 0.5972   |
| Unknown-ventricularly paced                                                |                    | 0.9389   |
| Unknown-ventricularly paced – heart failure interaction                    |                    | 0.7591   |

|                                                  |                  |        |
|--------------------------------------------------|------------------|--------|
| Left ventricular ejection fraction               |                  |        |
| Normal                                           | Reference        |        |
| Mild dysfunction                                 | 1.27 (0.82-1.98) | 0.2881 |
| Moderate dysfunction                             | 2.23 (1.52-3.27) | <.0001 |
| Severe dysfunction                               | 2.45 (1.51-3.98) | 0.0003 |
| Left atrial diameter                             |                  |        |
| Normal                                           | Reference        |        |
| Mild enlargement                                 |                  | 0.5074 |
| Mild enlargement – heart failure interaction     |                  | 0.468  |
| Moderate enlargement                             |                  | 0.1684 |
| Moderate enlargement – heart failure interaction |                  | 0.4599 |
| Severe enlargement                               |                  | 0.122  |
| Severe enlargement – heart failure interaction   |                  | 0.509  |
| eGFR ≤50                                         | 1.01 (0.98-1.03) | 0.4859 |
| 50 < eGFR ≤ 90                                   | 1.00 (0.99-1.01) | 0.4977 |
| eGFR >90                                         | 0.99 (0.98-1.01) | 0.4029 |
| Hematocrit, %                                    | 0.97 (0.94-1.00) | 0.0483 |
| AF type                                          |                  |        |
| First detected/New onset                         | Reference        |        |
| Paroxysmal                                       |                  | 0.9658 |
| Paroxysmal – heart failure interaction           |                  | 0.0489 |
| Persistent                                       |                  | 0.9654 |
| Persistent – heart failure interaction           |                  | 0.049  |
| EHRA Score                                       |                  |        |
| No symptoms                                      | Reference        |        |
| Mild                                             | 1.17 (0.89-1.55) | 0.2548 |
| Severe                                           | 1.29 (0.88-1.89) | 0.1834 |
| Disabling                                        | 1.00 (0.36-2.78) | 0.9945 |
| Rhythm control                                   | 0.99 (0.75-1.31) | 0.9395 |
| Antiarrhythmic drug use in past                  | 1.07 (0.80-1.42) | 0.6553 |
| AV node/HIS bundle ablation                      | 0.80 (0.32-1.99) | 0.6335 |
| AF duration, months                              | 1.00 (1.00-1.00) | 0.1356 |
| Functional status: not living independently      | 1.13 (0.71-1.78) | 0.6089 |
| Implanted device                                 | 1.31 (0.97-1.76) | 0.078  |
| Obstructive sleep apnea                          | 1.19 (0.77-1.85) | 0.4392 |
| On continuous positive airway pressure           | 0.61 (0.34-1.06) | 0.0815 |
| Statin                                           | 0.83 (0.63-1.10) | 0.2051 |
| Diuretic                                         | 1.95 (1.45-2.60) | <.0001 |
| Calcium channel blockers                         | 0.90 (0.67-1.20) | 0.4663 |

Abbreviations: AF = atrial fibrillation, CAD = coronary artery disease, CKD = chronic kidney disease, COPD = chronic obstructive pulmonary disease, CPAP = continuous positive airway pressure, eGFR = estimated glomerular filtration rate, HF = heart failure, HR = heart rate, LVEF = left ventricular ejection fraction, LAD = left atrial dimension, EHRA = European heart rhythm association, NYHA = New York Heart Association, PCI = percutaneous coronary intervention, MI = Myocardial infarction.
